# Supplementary material for: Assessing Impact of HPV Vaccination on Cervical Cancer Incidence among Women Aged 15–29 Years in the United States, 1999–2017: An Ecologic Study
Source: Oxford University Press journal article supplement (doi:10.1158/1055-9965.epi-20-0846), 2020-10-20
Supplement: 10559965epi200846-sup-244488_2_supp_6617406_qx7kdx.docx [file 10559965epi200846-sup-244488_2_supp_6617406_qx7kdx.docx]

**Supplementary Table. Cervical CancerIncidence Rates1,2 and Rate Ratios3 by Stage at Diagnosis United States, 1999-2017**

|  | **Age (years)** | | | | | | | | | |
| --- | --- | --- | --- | --- | --- | --- | --- | --- | --- | --- |
|  |  | **15-20** | | | **21-24** | | | **25-29** | | |
| **Stage at Diagnosis4** | **Year of diagnosis5** | **n** | **Rate** | **RR (95% CI)** | **n** | **Rate** | **RR (95% CI)** | **n** | **Rate** | **RR (95% CI)** |
| **Early** | 1999-2000 | 47 | 0.21 | REF | 192 | 1.34 | REF | 998 | 5.31 | REF |
|  | 2001-2002 | 34 | 0.15 | 0.71 (0.44, 1.13) | 177 | 1.17 | 0.87 (0.70, 1.07) | 828 | 4.62 | 0.87 (0.79, 0.95)* |
|  | 2003-2004 | 32 | 0.14 | 0.66 (0.41, 1.06) | 181 | 1.13 | 0.84 (0.68, 1.04) | 741 | 4.09 | 0.77 (0.70, 0.85)* |
|  | 2005-2006 | 47 | 0.20 | 0.95 (0.62, 1.46) | 166 | 1.02 | 0.76 (0.61, 0.94) | 727 | 3.91 | 0.74 (0.67. 0.81)* |
|  | 2007-2008 | 31 | 0.13 | 0.61 (0.37, 0.98)* | 140 | 0.86 | 0.64 (0.51, 0.80)* | 702 | 3.57 | 0.67 (0.61, 0.74)* |
|  | 2009-2010 | 25 | 0.10 | 0.48 (0.28, 0.79)* | 156 | 0.94 | 0.70 (0.56, 0.87)* | 717 | 3.57 | 0.67 (0.61, 0.74)* |
|  | 2011-2012 | 25 | 0.10 | 0.48(0.28, 0.80)* | 158 | 0.92 | 0.69 (0.55, 0.85)* | 629 | 3.08 | 0.58 (0.52, 0.64)* |
|  | 2013-2014 | 14 | 0.06 | 0.28 (0.14, 0.52)* | 114 | 0.63 | 0.47 (0.37, 0.60)* | 695 | 3.36 | 0.63 (0.57, 0.70)* |
|  | 2015-2017 | 15 | 0.04 | 0.20 (0.10, 0.36)* | 140 | 0.52 | 0.39 (0.31, 0.48)* | 1026 | 3.20 | 0.60 (0.55, 0.66)* |
| **Late** | 1999-2000 | 10 | 0.04 | REF | 52 | 0.36 | REF | 255 | 1.36 | REF |
|  | 2001-2002 | 13 | 0.06 | 1.27 (0.52, 3.25) | 59 | 0.39 | 1.07 (0.72, 1.58) | 278 | 1.55 | 1.14 (0.96, 1.36) |
|  | 2003-2004 | 15 | 0.06 | 1.45 (0.61, 3.61) | 52 | 0.32 | 0.89 (0.59, 1.33) | 242 | 1.36 | 1.00 (0.83, 1.20) |
|  | 2005-2006 | 12 | 0.05 | 1.15 (0.45, 2.96) | 54 | 0.33 | 0.91 (0.61, 1.36) | 260 | 1.40 | 1.03 (0.86, 1.23) |
|  | 2007-2008 | 16 | 0.06 | 1.47 (0.63, 3.63) | 66 | 0.41 | 1.12 (0.77, 1.64) | 291 | 1.49 | 1.10 (0.92, 1.30) |
|  | 2009-2010 | 14 | 0.06 | 1.26 (0.52, 3.16) | 61 | 0.37 | 1.01 (0.69, 1.50) | 307 | 1.52 | 1.12 (0.95, 1.33) |
|  | 2011-2012 | 13 | 0.05 | 1.18 (0.48, 3.01) | 59 | 0.34 | 0.95 (0.64, 1.40) | 277 | 1.36 | 1.00 (0.84, 1.19) |
|  | 2013-2014 | 9 | 0.04 | 0.84 (0.30, 2.30) | 65 | 0.36 | 1.00 (0.68, 1.47) | 354 | 1.71 | 1.26 (1.07, 1.49) |
|  | 2015-2017 | 16 | 0.04 | 1.00 (0.43, 2.47) | 72 | 0.27 | 0.74 (0.51, 1.08) | 517 | 1.61 | 1.19 (1.02, 1.38) |
| **Unstaged** | 1999-2000 | 22 | 0.10 | REF | 43 | 0.30 | REF | 108 | 0.57 | REF |
|  | 2001-2002 | 14 | 0.06 | 0.63 (0.30, 1.28) | 31 | 0.20 | 0.68 (0.41, 1.10) | 92 | 0.52 | 0.90 (0.68, 1.20) |
|  | 2003-2004 | 6 | 0.03 | 0.27 (0.09, 0.68)* | 32 | 0.20 | 0.67 (0.40, 1.07) | 76 | 0.42 | 0.74 (0.54, 1.00) |
|  | 2005-2006 | 13 | 0.05 | 0.56 (0.26, 1.17) | 37 | 0.23 | 0.76 (0.48, 1.22) | 63 | 0.33 | 0.58 (0.42, 0.80)* |
|  | 2007-2008 | 12 | 0.05 | 0.51 (0.23, 1.07) | 22 | 0.14 | 0.45 (0.26, 0.77)* | 82 | 0.41 | 0.71 (0.53, 0.96)* |
|  | 2009-2010 | 15 | 0.06 | 0.61 (0.29, 1.23) | 31 | 0.19 | 0.63 (0.38, 1.02) | 64 | 0.31 | 0.55 (0.39, 0.75)* |
|  | 2011-2012 | 10 | 0.04 | 0.41 (0.17, 0.90)* | 20 | 0.12 | 0.39 (0.22, 0.67)* | 55 | 0.26 | 0.46 (0.32, 0.64)* |
|  | 2013-2014 | -- | -- | -- | 11 | 0.06 | 0.20 (0.09, 0.40)* | 66 | 0.32 | 0.55 (0.40, 0.75)* |
|  | 2015-2017 | -- | -- | -- | 17 | 0.06 | 0.21 (0.11, 0.38)* | 88 | 0.27 | 0.47 (0.35, 0.63)* |

*Data Sources: Center for Disease Control and Prevention’s National Program of Cancer Registries and the National Cancer Institute’s Surveillance, Epidemiology, and End Results Program. Incidence data compiled from cancer registries that met data quality standards from 1999 to 2017, covering 97.8% of the US population.

1Cervical cancers (ICD-O-3 site codes C53.0-C53.9) were limited to ICD-O-3 histology codes 8000-9049, 9056-9139, and 9141-9589 and were microscopically confirmed.

2Rates for women aged 15-29 are age-adjusted to the 2000 US Standard Population (Census P25-1130) standard.

395% confidence intervals calculated using the Tiwari method

4Cancer stage derived using SEER Summary Stage guidelines; Early = localized cancers, Late = regional and distant cancers, unstaged = unknown or unstaged cancers

5Year of diagnosis grouped into 2-year or 3-year intervals due to sparse data

*Statistically significant at P <.05
